# Supplementary material for: Luteolin and Vernodalol as Bioactive Compounds of Leaf and Root Vernonia amygdalina Extracts: Effects on α-Glucosidase, Glycation, ROS, Cell Viability, and In Silico ADMET Parameters
Source: MDPI journal article supplement (doi:10.3390/pharmaceutics15051541), 2023-05-19
Supplement: s1 [file s1]

Article

# Luteolin and Vernodalol as Bioactive Compounds of Leaf and Root *Vernonia amygdalina* Extracts: Effects on $\alpha$ -Glucosidase, Glycation, ROS, Cell Viability, and In Silico ADMET Parameters

Francine Medjiofack Djeu, Valentina Stablum, Elisa Pangrazzi, Eugenio Ragazzi and Guglielmina Frolidi \*

Department of Pharmaceutical and Pharmacological Sciences, University of Padova, 35131 Padova, Italy; francine.medjiofackdjeu@phd.unipd.it (F.M.D.); etwvalentina@gmail.com (V.S.); elisapangrazzi99@gmail.com (E.P.); eugenio.ragazzi@unipd.it (E.R.)

\* Correspondence: g.frolidi@unipd.it; Tel.: +39-049-827-5092; Fax: +39-049-827-5093

**Citation:** Djeu, F.M.; Stablum, V.; Pangrazzi, E.; Ragazzi, E.; Frolidi, G. Luteolin and Vernodalol as Bioactive Compounds of Leaf and Root *Vernonia amygdalina* Extracts: Effects on  $\alpha$ -Glucosidase, Glycation, ROS, Cell Viability, and In Silico ADMET Parameters. *Pharmaceutics* **2023**, *15*, 1541. <https://doi.org/10.3390/pharmaceutics15051541>

Academic Editors: Jadwiga Renata Ochocka and Justyna Stefanowicz-Hajduk

Received: 27 March 2023

Revised: 15 May 2023

Accepted: 18 May 2023

Published: 19 May 2023

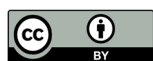

**Copyright:** © 2023 by the authors. Licensee MDPI, Basel, Switzerland. This article is an open access article distributed under the terms and conditions of the Creative Commons Attribution (CC BY) license (<https://creativecommons.org/licenses/by/4.0/>).

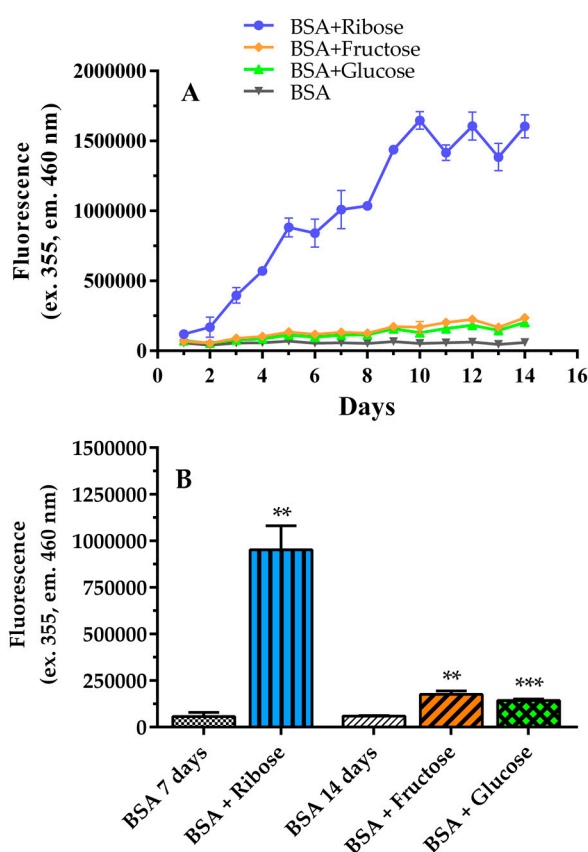

**Figure S1.** Kinetics of BSA glycation obtained with three different glycating agents, such as ribose, fructose and glucose. \*\*:  $p < 0.01$ ; \*\*\*  $p < 0.005$  versus  $\alpha$ -glucosidase activity.
